# Supplementary material for: Gold nano-particles (AuNPs) carrying anti-EBV-miR-BART7-3p inhibit growth of EBV-positive nasopharyngeal carcinoma
Source: PubMed Central journal article supplement (PMC4480720; doi:10.18632/oncotarget.3046), 2015-02-19
Supplement: oncotarget-06-7838-s001.pdf [file oncotarget-06-7838-s001.pdf]

## SUPPLEMENTARY FIGURES AND TABLES

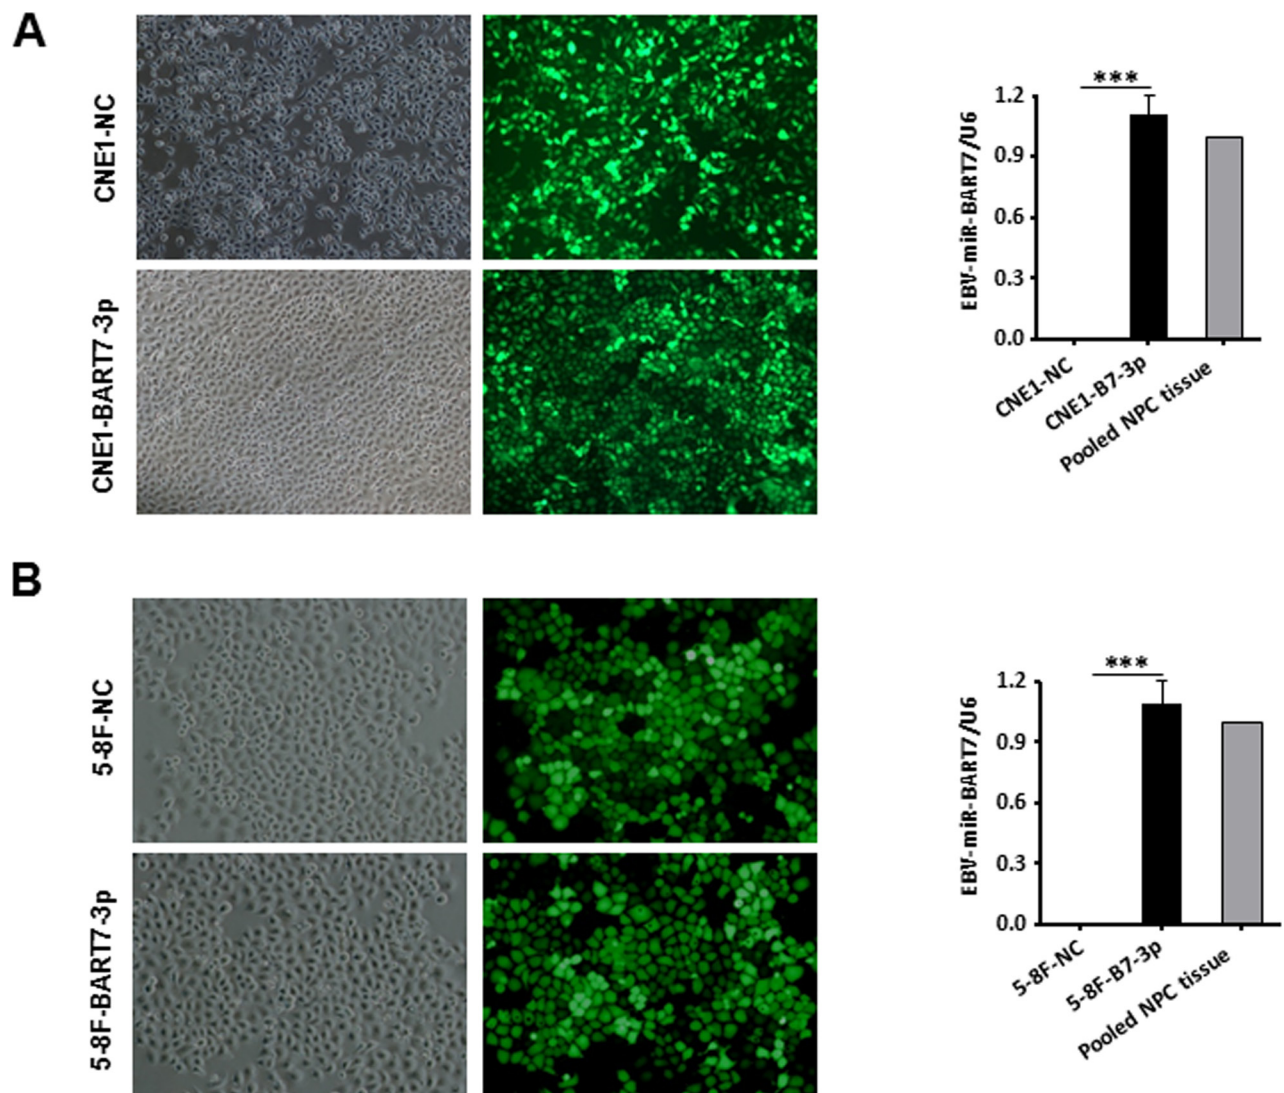

**Supplementary Figure S1: NPC cell lines (GFP+) stably expressing EBV-miR-BART7-3p (5-8F-BART7-3p and CNE1-BART7-3p cells) were generated using lentivirus infection. (A, B) 5-8F-BART7-3p cells and CNE1-BART7-3p cells were screened respectively by GFP using FACS cytometer. qPCR validated EBV-miR-BART7-3p expression in 5-8F-BART7-3p, CNE1-BART7-3p cells compared to their corresponding control cells (5-8F-NC and CNE1-NC) and clinical NPC tissue sample (5 samples were pooled). Data were plotted as mean values  $\pm$  SEM (\*\*\*)  $P < 0.001$ .**

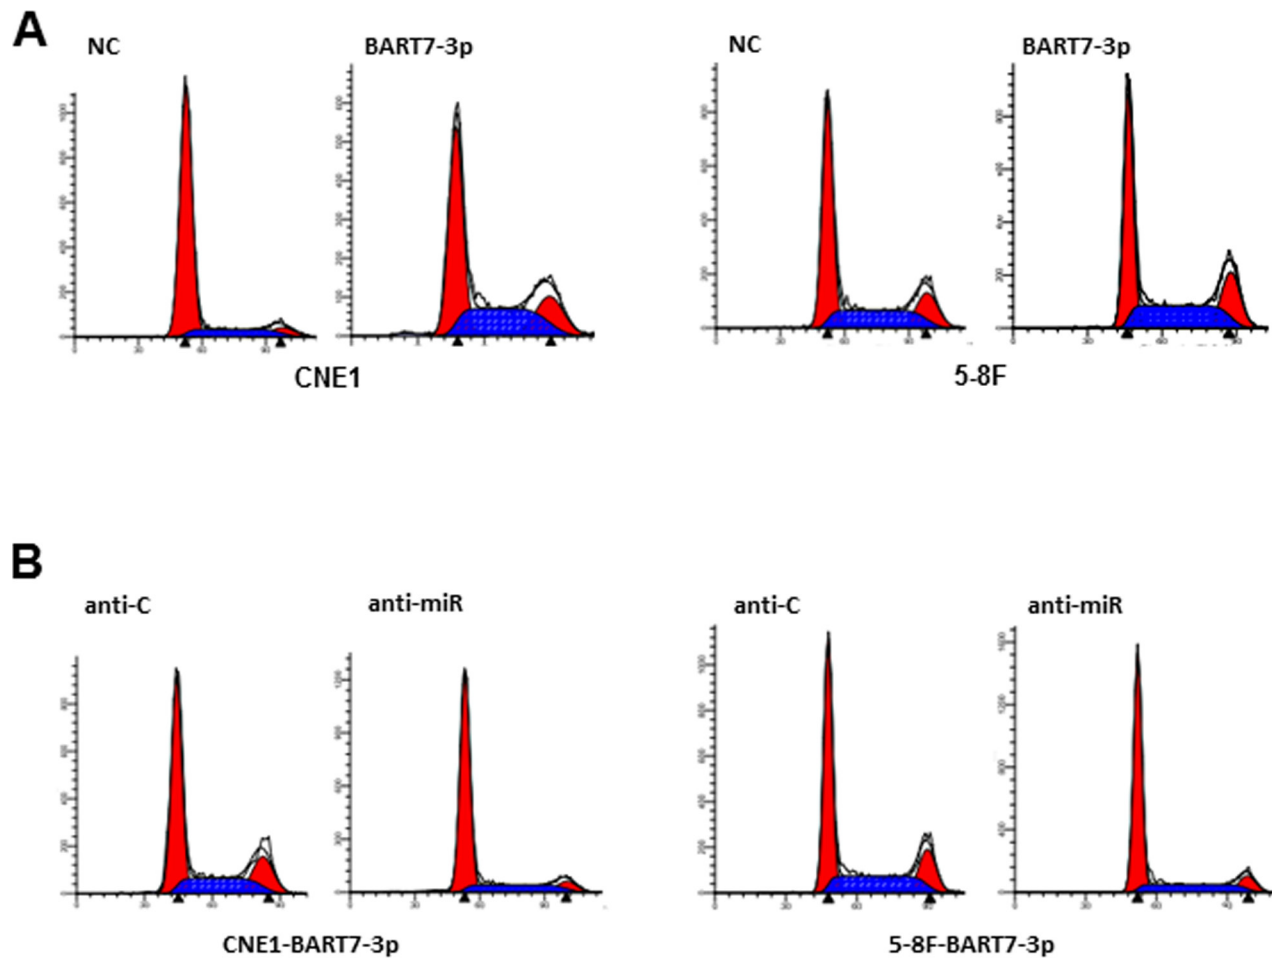

**Supplementary Figure S2: Cell cycle distribution was tested by flow cytometry.** (A) Cell cycle distribution was tested by flow cytometry in CNE1-BART7-3p and 5-8F-BART7-3p cells. (B) Cell cycle distribution was tested by flow cytometry in two stable NPC cells after the treatment of anti-miR.

**A**

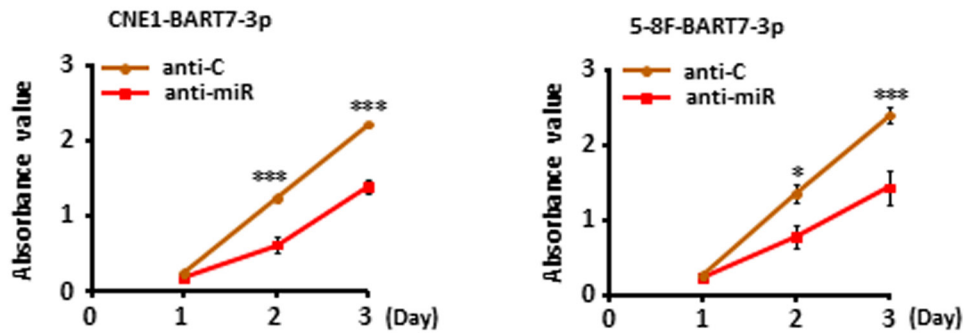

**B**

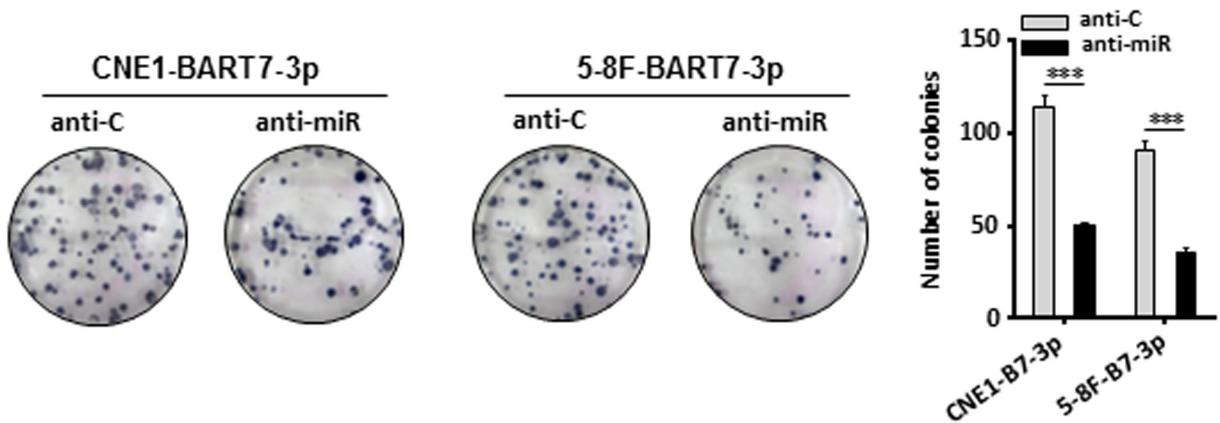

**C**

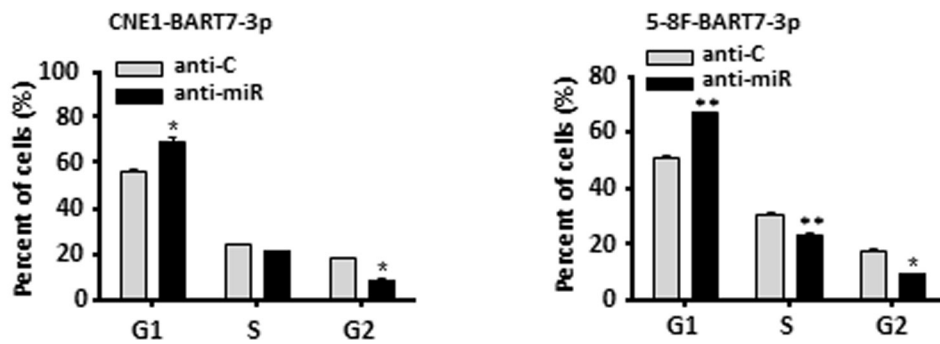

**Supplementary Figure S3: The growth and proliferation was significantly inhibited in CNE1-BART7-3p and 5-8F-BART7-3p cells following the treatment of anti-miR. (A)** Assessment of proliferation in CNE1-BART7-3p and 5-8F-BART7-3p cells after the treatment of anti-miR by MTT assay. Data are plotted as mean values  $\pm$  SEM ( $*P < 0.05$ ,  $***P < 0.001$ ). **(B),(C)** The colony formation ability and cell cycle distribution in CNE1-BART7-3p and 5-8F-BART7-3p cells after the treatment of anti-miR. Data are plotted as mean values  $\pm$  SEM ( $*P < 0.05$ ;  $**P < 0.01$ ;  $***P < 0.001$ ).

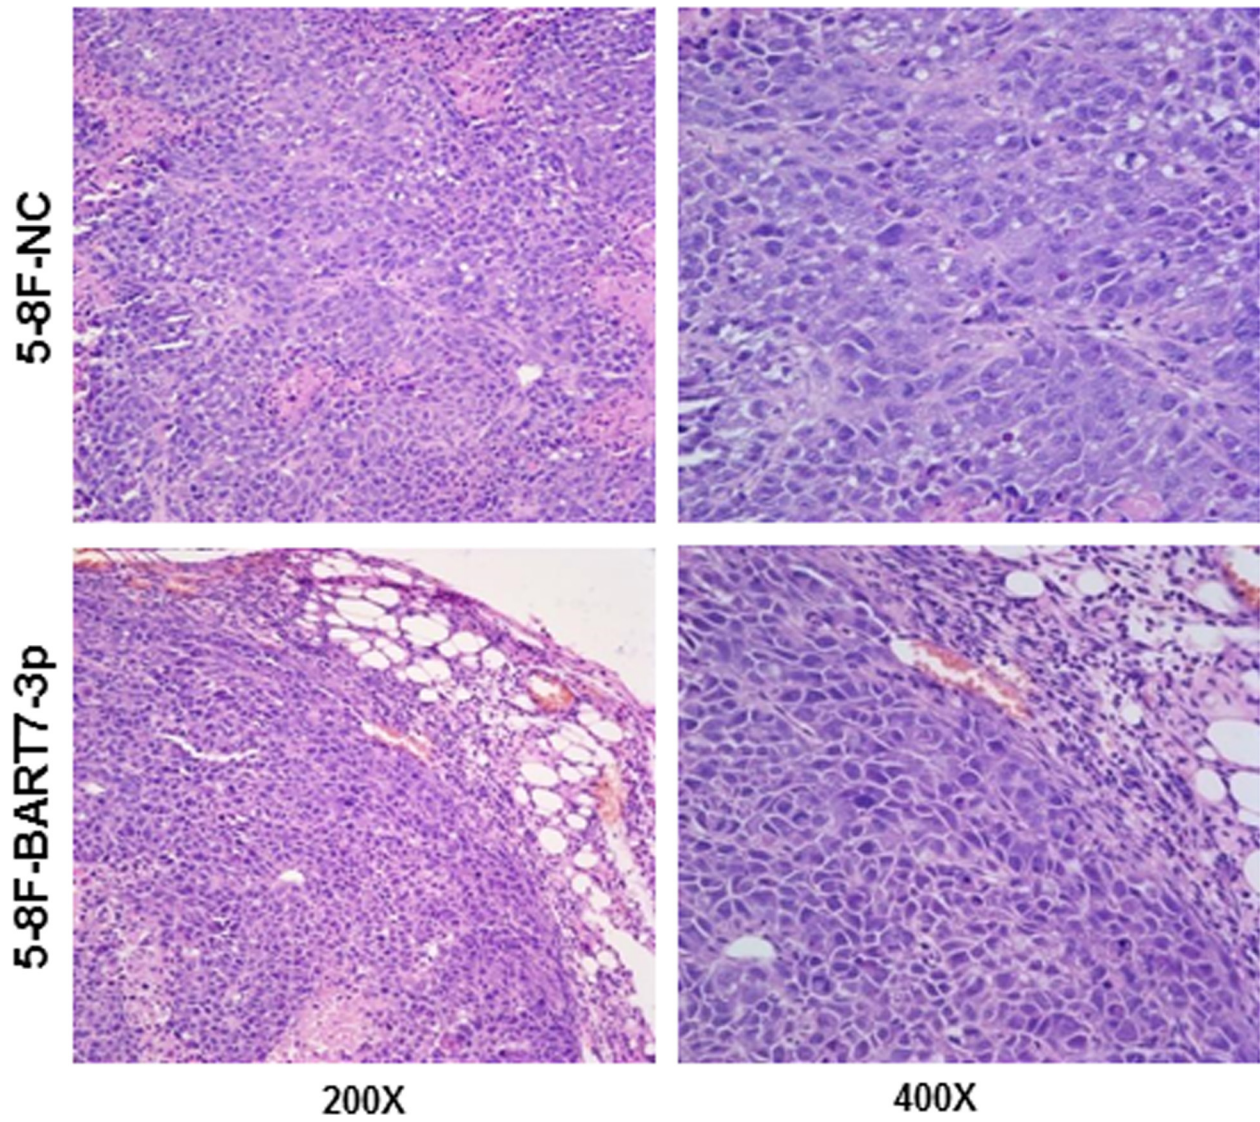

Supplementary Figure S4: HE staining confirmed xenograft tumor. Original magnification,  $\times 200$ ,  $\times 400$ .

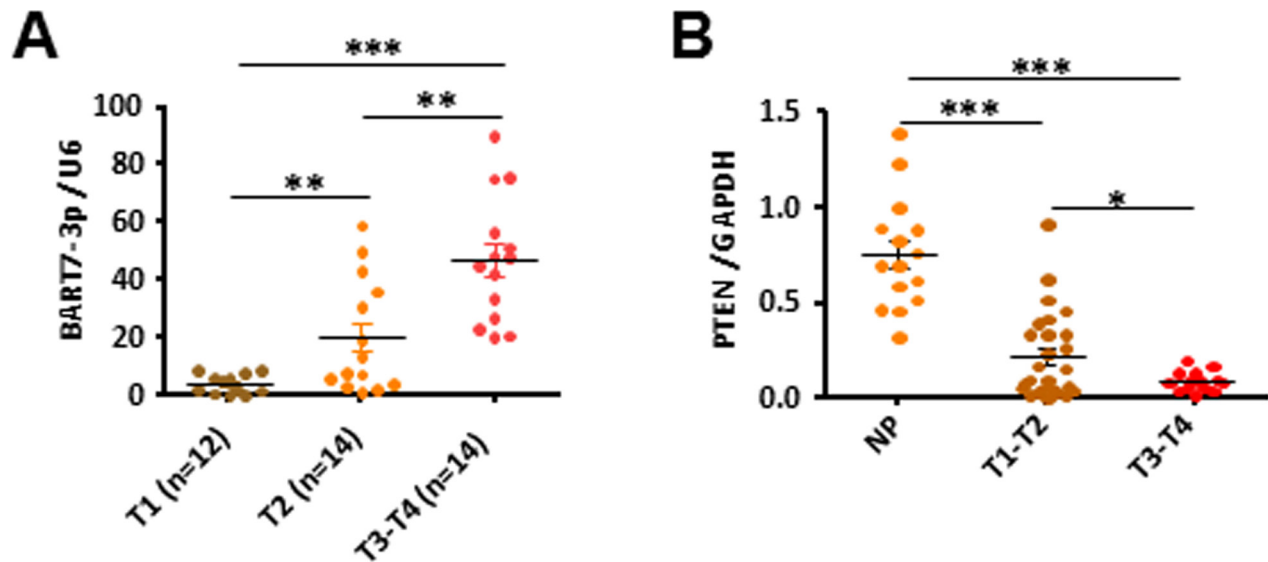

**Supplementary Figure S5: The expression of EBV-miR-BART7-3p and PTEN in clinical NPC samples.** (A) The expression level of EBV-miR-BART7-3p normalized to U6 snRNA was tested by qPCR in clinical NPC tissue samples with clinical T stage. (B) PTEN expression normalized to GAPDH expression was detected by qPCR in NPC samples with T stage information and NP samples. The data were shown as the mean ± SEM (\**P* < 0.05, \*\**P* < 0.01, \*\*\**P* < 0.001).

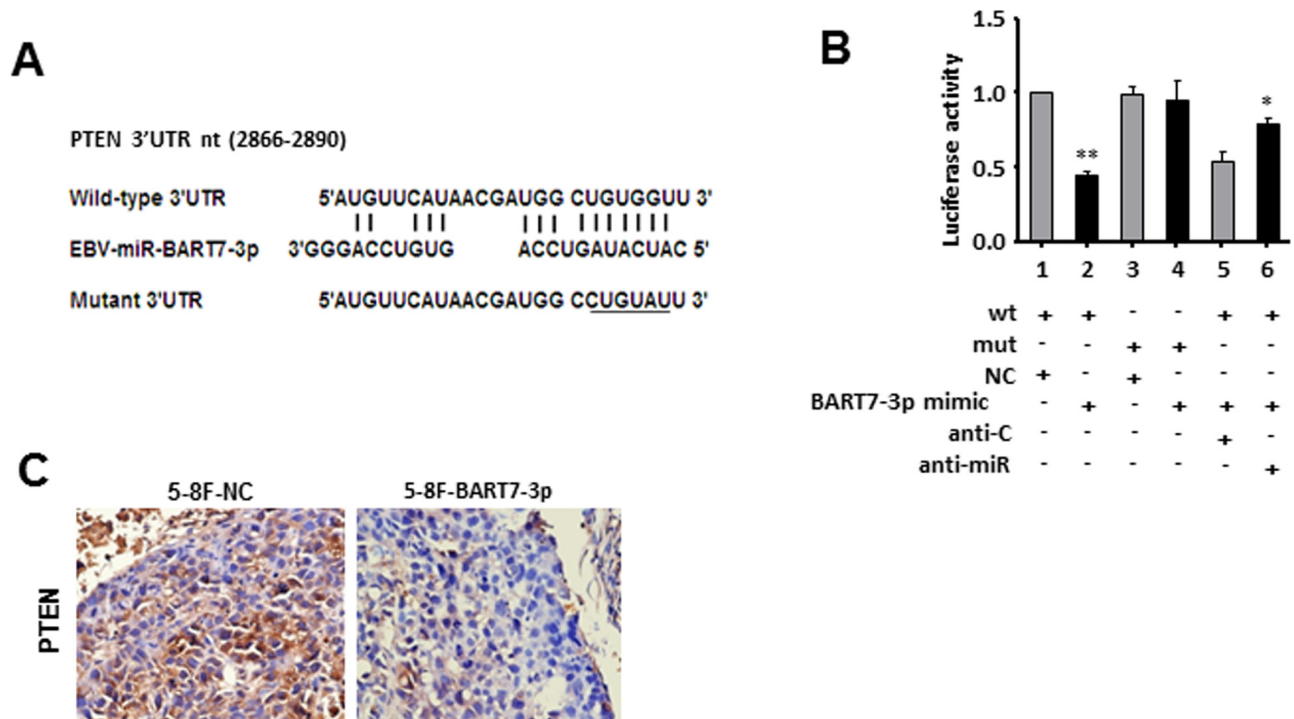

**Supplementary Figure S6: PTEN was further validated to be a target of EBV-miR-BART7-3p.** (A) A new putative binding site was predicted in the 3'UTR of PTEN by RNAhybrid. (B) EBV-miR-BART7-3p mimic or NC were cotransfected with luciferase reporters carrying the wild or the mutant binding site within PTEN 3'UTR (wt) into 293T cells. Additionally, EBV-miR-BART7-3p mimic were cotransfected with anti-miR or anti-C and luciferase reporters carrying the wild-type binding site into 293T cells. Data were plotted as mean values ± SEM (\**P* < 0.05, \*\**P* < 0.01). (C) PTEN expression was evaluated by IHC in tumor tissues derived from NPC models compared with control models. Original magnification, × 400.

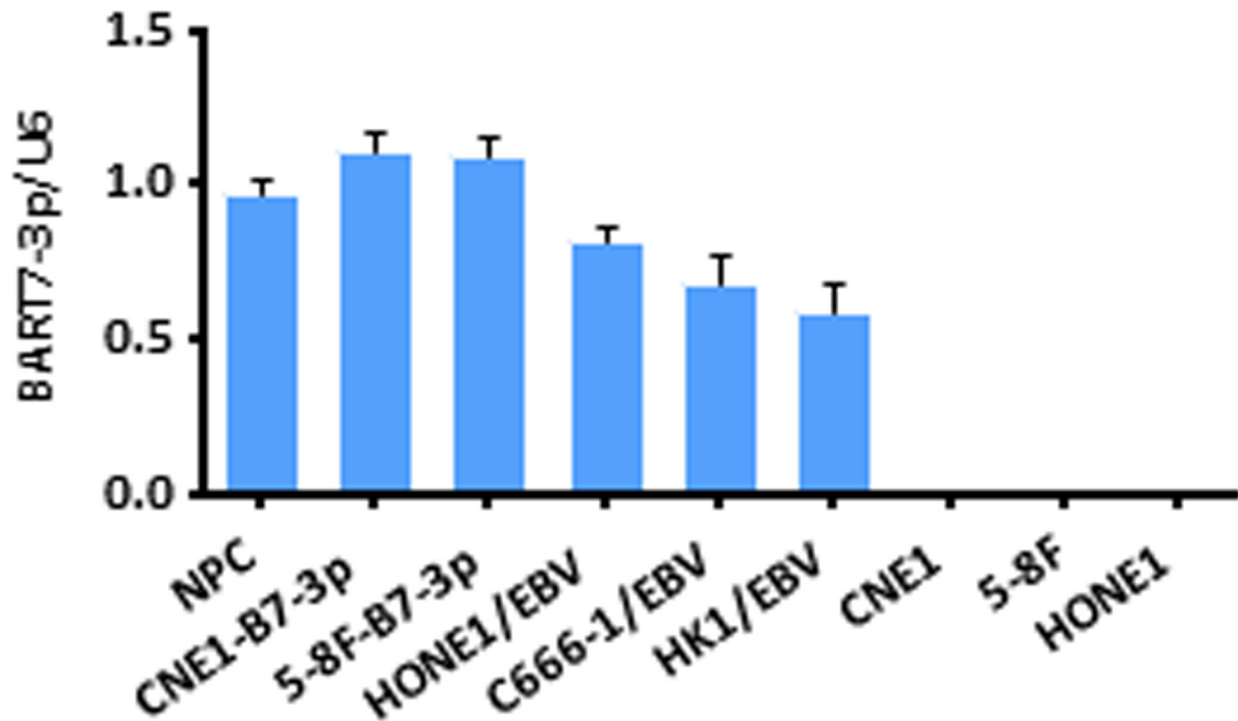

**Supplementary Figure S7: The detection of EBV-miR-BART7-3p expression in NPC cell lines.** EBV-miR-BART7-3p expression was examined by qPCR in three NPC EBV-positive cells, pooled NPC tissues (5 samples were pooled), CNE1-BART7-3p, 5-8F-BART7-3p cells and three EBV-negative NPC cell lines. Data were plotted as mean values ± SEM.

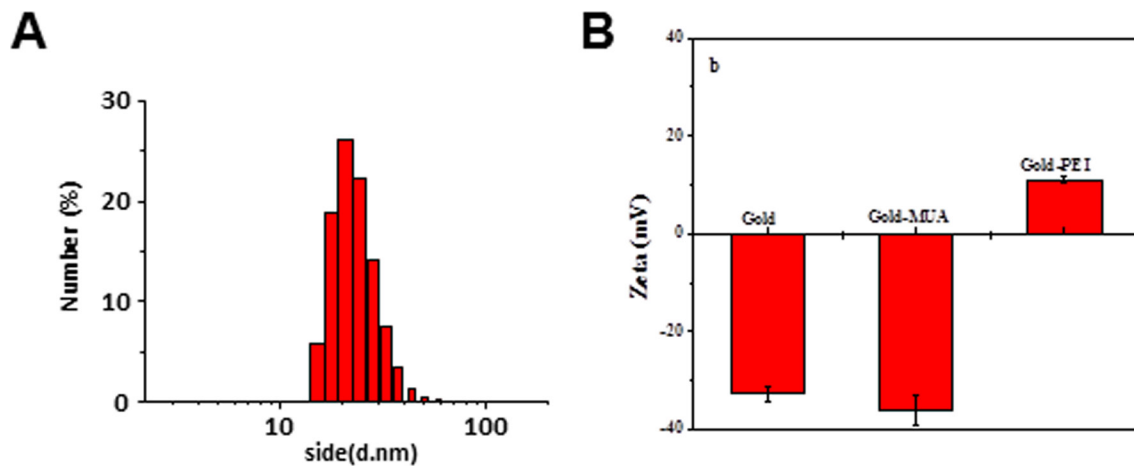

**Supplementary Figure S8: The size of Gold-PEI nano-carrier.** (A) The size of Gold-PEI nano-carrier was measured by dynamic lighting scatter (DLS). (B) The zeta potential of gold-PEI nano-carrier was positive charge.

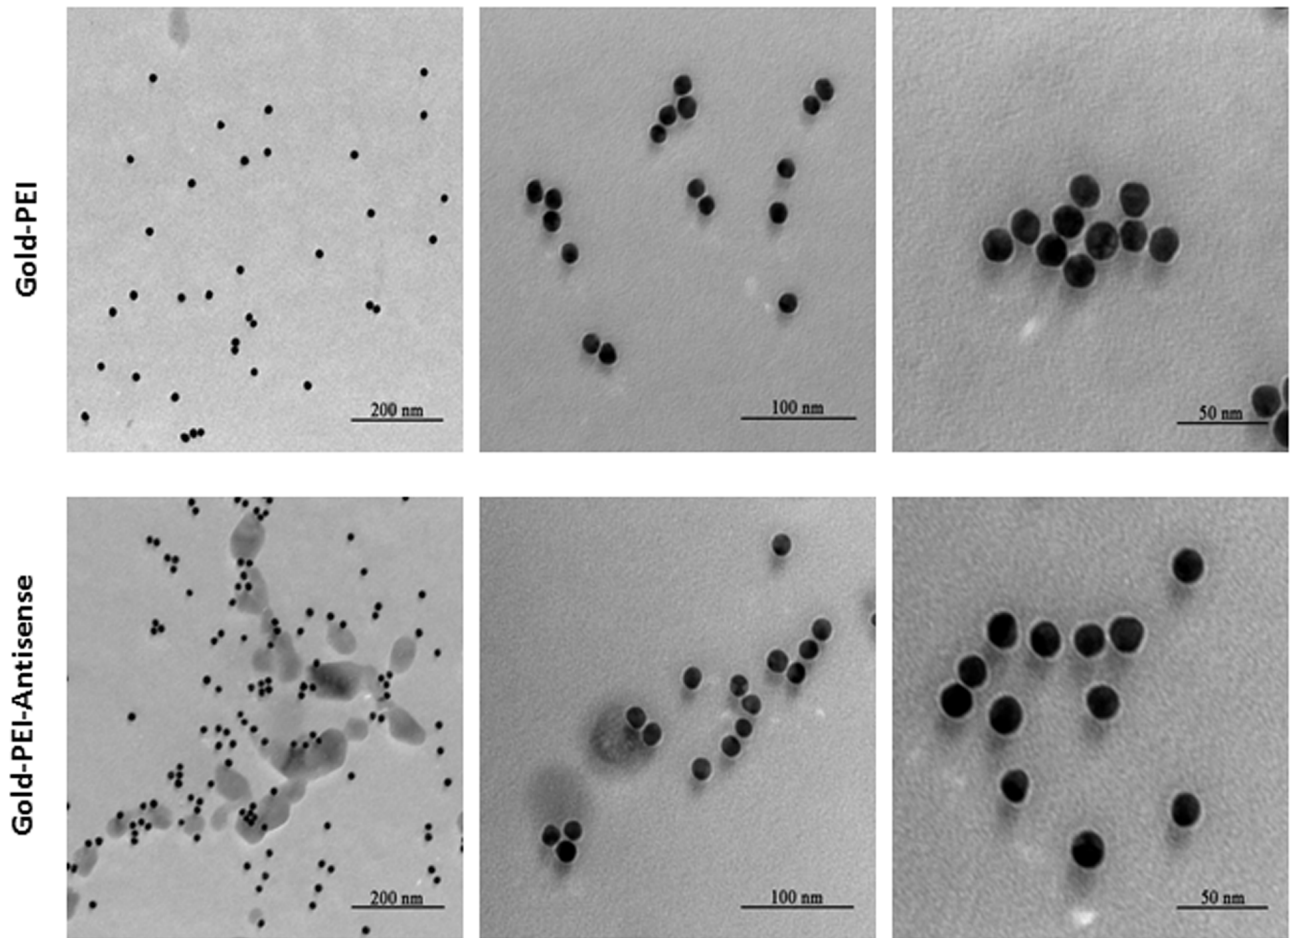

**Supplementary Figure S9: Gold-PEI nano-carrier morphology.** The size and shape of Gold-PEI nano-carrier were confirmed by the transmission electron microscopy (TEM).

**Supplementary Table S1: The information of Clinical samples for clinical data analysis**

| Characteristics           | Clinical samples    |                      |                 |
|---------------------------|---------------------|----------------------|-----------------|
|                           | NP ( <i>n</i> = 15) | NPC ( <i>n</i> = 40) | <i>p</i> -value |
| Age, years                | 41.67               | 44.22                | 0.4640*         |
| Gender, male              | 8                   | 32                   | 0.0861&         |
| Poorly differentiated SCC |                     | 1                    |                 |
| Undifferentiated cancer   |                     | 39                   |                 |
| Differentiated SCC        |                     | 0                    |                 |

**Supplementary Table S2: Clinicopathological characteristics of patients with NPC**

| Characteristic            | No of patients (N = 40) |
|---------------------------|-------------------------|
| Sex                       |                         |
| Male                      | 32                      |
| Female                    | 8                       |
| Age (years)               |                         |
| ≤ 45                      | 26                      |
| > 45                      | 14                      |
| Histological type         |                         |
| Poorly differentiated SCC | 1                       |
| Undifferentiated cancer   | 39                      |
| Differentiated SCC        | 0                       |
| T stage                   |                         |
| T1                        | 12                      |
| T2                        | 14                      |
| T3                        | 6                       |
| T4                        | 8                       |
| N stage                   |                         |
| N0                        | 9                       |
| N1                        | 9                       |
| N2                        | 12                      |
| N3                        | 10                      |
| M stage                   |                         |
| M0                        | 38                      |
| M1                        | 1                       |
| M2                        | 1                       |
| M3                        | 0                       |
| TNM stage                 |                         |
| I                         | 4                       |
| II                        | 9                       |
| III                       | 14                      |
| IV                        | 13                      |

**Supplementary Table S3: RNA oligoribonucleotides for EBV-miR-BART7-3p**

| Mimic and anti-miR | Sense strand (5'-3')   |
|--------------------|------------------------|
| mimic              | CAUCAUAGUCCAGUGUCCAGGG |
| NC                 | UUCUCCGAACGUGUCACG     |
| anti-miR           | CCCUGGACACUGGACUAUGAUG |
| anti- C            | CAGUACUUUUGUGUAGUACAA  |



**Supplementary Table S4: Primers for qRT-PCR assay of cell cycle regulators**

| Gene                 | Forward primer (5'-3') | Reverse primer (5'-3')    |
|----------------------|------------------------|---------------------------|
| CCND1                | GTCCTGGTGAACAAGCTCAA   | TTGGAGAGGAAGTGTTCAATGAAA  |
| CCND2                | TCATGACTTCATTGAGCA     | CACTTCCTCATCCTGCTG        |
| CDK4                 | TTCGTGAGGTGGCTTTACTG   | GATATGTCCTTAGGTCCTGGTCT   |
| CCNE1                | CTTCACAGGGAGACCTTTTAC  | CATTCAGCCAGGACACAATAG     |
| CCNA1                | TAGACACCGGCACACTCAAG   | AGGAGAGATGAATCTACCAGCAT   |
| CDK2                 | TTCTGCCATTCTCATCGG     | ATGGGTGTAAGTACGAACAGG     |
| CCNB1                | AACTTTCGCCTGAGCCTATTTT | TTGGTCTGACTGCTTGCTCTT     |
| CDK1                 | CTAACAGCAGAGAGCGTCACC  | AAAGGTTTGATAACTGTGCCCA    |
| p15 <sup>INK4B</sup> | GTTTTGGCGACCCCTGTAGAC  | GCATTCCACCAGACAAACTATCA   |
| p16 <sup>INK4A</sup> | ACCGAATAGTTACGGTCGGAGG | CATCATCATGACCTGGTCTTCTAGG |
| p21 <sup>CIP1</sup>  | GGCAGACCAGCATGACAGATT  | GCGGATTAGGGCTTCCTCTT      |
| p27 <sup>KIP1</sup>  | AAAGCACTCAGCAGATGGGTT  | GATGCACGTTCCAGAGTTTCG     |
| pRb                  | GCAGTATGCTTCCACCAGGC   | AAGGGCTTCGAGGAATGTGAG     |
| GAPDH                | GGTGAAGGTCCGAGTCAACGGA | GTCATGGATGACCTTGCCAGG     |

**Supplementary Table S5: Primers for qRT-PCR assay of miRNA and PTEN**

| Primers          | Sense strand (5'-3')   |
|------------------|------------------------|
| EBV-miR-BART7-3p | CATCATAGTCCAGTGTCCAGGG |
| U6               | CTCGCTTCGGCAGCACATATA  |
| PTEN Forward     | TGTGGTCTGCCAGCTAAAGG   |
| PTEN Reverse     | CGGCTGAGGGAACTCAAAGT   |
| GAPDH Forward    | GGTGAAGGTCCGAGTCAACGGA |
| GAPDH Reverse    | GTCATGGATGACCTTGCCAGG  |

**Supplementary Table S6: The information of antibodies**

| Antibody      | Cat. No.   | Company     | Molecular weight | Dilution(WB/IHC) |
|---------------|------------|-------------|------------------|------------------|
| PTEN          | BS1305     | Bioworld    | 54kDa            | 1:800/1:200      |
| Akt           | BS2987     | Bioworld    | 55kDa            | 1:1000           |
| Akt(p-Ser473) | AM1006     | ABZOOM      | 60kDa            | 1:1000           |
| c-Myc         | 1472-1     | Epitomics   | 57kDa            | 1:1000           |
| c-Jun         | 1696-1     | Epitomics   | 43kDa            | 1:1000           |
| Cyclin D1     | 10438-1-AP | proteintech | 34kDa            | 1:800            |
| Cyclin E1     | 1655-1     | Epitomics   | 47kDa            | 1:800            |
| p21           | 3733-1     | Epitomics   | 21kDa            | 1:1000           |
| Ki67          | ab16667    | Abcam       |                  | 1:400            |
| PCNA          | A0264      |             |                  | 1:100            |
| Beta-actin    | Jan-79     | Epitomics   | 43kDa            | 1:1000           |
